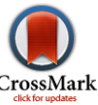

Correction

# Correction: A Systematic Review of Mapping Strategies for the Sonification of Physical Quantities

The PLOS ONE Staff

Table 9 has been corrected.  
Please see the corrected Table 9 here:

**Table 9.** Use of auditory dimensions regardless of the sonified physical dimensions in the case of the multi-class dimension Spatialization.

| Label                         | Class of spatialization             | Proportion |
|-------------------------------|-------------------------------------|------------|
| A17 <sub>1</sub> <sup>†</sup> | Stereo panning                      | 53.2*      |
| A17 <sub>2</sub>              | Multichannel panning                | 17.0       |
| A17 <sub>9</sub>              | Non-specified spatialization method | 14.9       |
| A17 <sub>7</sub>              | Interaural amplitude difference     | 12.8       |
| A17 <sub>4</sub> <sup>†</sup> | Head-related transfer function      | 10.6       |
| A17 <sub>6</sub>              | Interaural time difference          | 10.6       |
| A17 <sub>3</sub> <sup>†</sup> | Vector base amplitude panning       | 6.4        |
| A17 <sub>5</sub>              | Ambisonics                          | 6.4        |
| A17 <sub>8</sub>              | Interaural frequency difference     | 2.1        |

Classes of spatialization ranked according to their proportion of use with respect to the total number of mapping occurrences involving Spatialization (A17). Significantly higher percentages (†) are indicated with a star (\*).  
doi:10.1371/journal.pone.0082491.t009

## Reference

- Dubus G, Bresin R (2013) A Systematic Review of Mapping Strategies for the Sonification of Physical Quantities. PLoS ONE 8(12): e82491. doi:10.1371/journal.pone.0082491

**Citation:** The PLOS ONE Staff (2014) Correction: A Systematic Review of Mapping Strategies for the Sonification of Physical Quantities. PLoS ONE 9(4): e96018. doi:10.1371/journal.pone.0096018

**Published:** April 23, 2014

**Copyright:** © 2014 The PLOS ONE Staff. This is an open-access article distributed under the terms of the Creative Commons Attribution License, which permits unrestricted use, distribution, and reproduction in any medium, provided the original author and source are credited.
